# Supplementary material
Source: ML conference proceedings conference paper supplement (https://openaccess.thecvf.com/content/CVPR2025/html/Wen_Reconstructing_In-the-Wild_Open-Vocabulary_CVPR_2025_paper.html)
Supplement: Supplementary file 1 [file Wen_Reconstructing_In-the-Wild_Open-Vocabulary_CVPR_2025_supplemental.zip]

# Reconstructing In-the-Wild Open-Vocabulary Human-Object Interactions

## Supplementary Material

### Overview

The contents of this supplementary material are:

- Sec. 1: Characteristics of Open3DHOI.
- Sec. 2: Method Details.
- Sec. 2.2.3: Additional Experiments.

### 1. Characteristics of Open3DHOI

#### 1.1. Image Selection for Open3DHOI

Considering the complexity and difficulty of the 3D HOI annotation process, we only select images with single-person annotation from the existing 2D HOI dataset, HAKE, and SWIG-HOI. There are 63 images in our final dataset that have multiple objects interacting with one person. For these images, we split the annotation to keep one image having one HOI pair.

**Interaction.** Notice that we have 3,671 interactions, more than our image number, 2,561, because one person can interact with an object with multiple actions, like drinking with and holding a bottle at the same time. Fig. 9 shows the co-occurrence between the major object categories and actions, and Tab. 1 shows the object list in our Open3DHOI dataset.

**Object size.** The object size in our dataset varies significantly across different categories, and even within the same category, there is also a variation in size. In Fig. 2, we chose object categories with more than 30 images and draw the size distribution in each category. We use the volume function from Trimesh to compute the volume of each object mesh, then take the cube root to obtain the size. We can see that object like elephants has larger sizes and bottles has smaller sizes. What's more, for objects like wine glasses, the size variation within the category is minimal, while for objects like couches, the variation is much larger. Fig. 3 shows the size distribution of all images.

**Abnormal HOI.** Because our dataset is created from 2D HOI datasets, which have many abnormal HOIs like standing on a chair, our dataset also contains many abnormal interactions. Fig. 4 shows some cases of our abnormal HOIs.

#### 1.2. Contact Annotation

In our manual annotation process, we annotate the contact regions for images with qualified reconstruction. We split the human SMPL-X body into 34 parts and counted the number of annotations for each body part in Tab. 2. In Fig. 5, we show body parts on SMPL-X mesh and annotation heat map. It can be observed that interactions involving the hands, feet, and legs occur more frequently than those

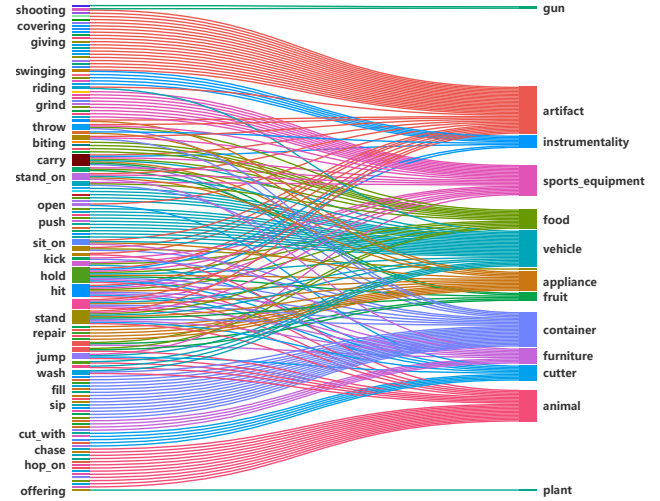

Figure 1. Co-occurrence between major object category and actions in Open3DHOI.

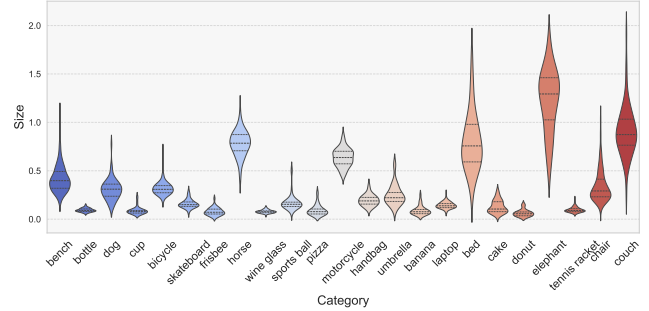

Figure 2. Object size distribution in different object categories.

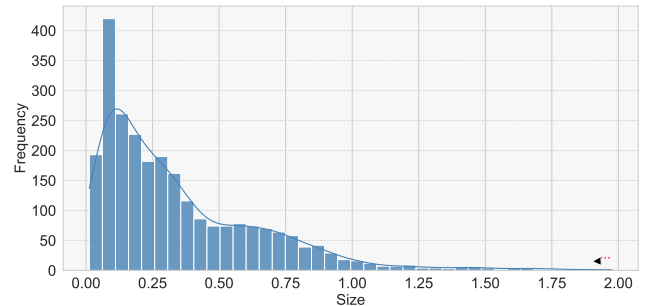

Figure 3. Object size distribution of all images.

involving other body regions.

Table 1. Object categories in our Open3DHOI dataset.

| Object Id | Object Class      | Object Id | Object Class | Object Id | Object Class | Object Id | Object Class   |
|-----------|-------------------|-----------|--------------|-----------|--------------|-----------|----------------|
| 0         | bird              | 1         | television   | 2         | surfboard    | 3         | dining table   |
| 4         | mug               | 5         | bench        | 6         | goat         | 7         | Gallus gallus  |
| 8         | fish              | 9         | eggs         | 10        | torch        | 11        | rose           |
| 12        | award             | 13        | guitar       | 14        | pistol       | 15        | ashcan         |
| 16        | baseball glove    | 17        | bowl         | 18        | shovel       | 19        | bottle         |
| 20        | cookie            | 21        | piano        | 22        | home plate   | 23        | furniture      |
| 24        | barrow            | 25        | dog          | 26        | boot         | 27        | pot            |
| 28        | handcart          | 29        | cell phone   | 30        | donkey       | 31        | hair drier     |
| 32        | basket            | 33        | airplane     | 34        | chain        | 35        | oven           |
| 36        | box               | 37        | cup          | 38        | truck        | 39        | bicycle        |
| 40        | snowboard         | 41        | bucket       | 42        | cat          | 43        | pump           |
| 44        | hammock           | 45        | skateboard   | 46        | stone        | 47        | sniper rifle   |
| 48        | cattle            | 49        | tiger        | 50        | power drill  | 51        | mouse          |
| 52        | frisbee           | 53        | helmet       | 54        | violin       | 55        | hobby          |
| 56        | car               | 57        | book         | 58        | horse        | 59        | camel          |
| 60        | fire hydrant      | 61        | backpack     | 62        | backhoe      | 63        | wine glass     |
| 64        | sports ball       | 65        | clock        | 66        | scissors     | 67        | pizza          |
| 68        | raft              | 69        | motorcycle   | 70        | hammer       | 71        | loaf of bread  |
| 72        | handbag           | 73        | teddy bear   | 74        | suitcase     | 75        | vacuum cleaner |
| 76        | pitcher           | 77        | tie          | 78        | vase         | 79        | keyboard       |
| 80        | pumpkin           | 81        | ice cream    | 82        | boat         | 83        | kite           |
| 84        | tarpaulin         | 85        | umbrella     | 86        | dinghy       | 87        | package        |
| 88        | coffee cup        | 89        | banana       | 90        | laptop       | 91        | knife          |
| 92        | mortar            | 93        | hot dog      | 94        | hairbrush    | 95        | bed            |
| 96        | float             | 97        | spoon        | 98        | cow          | 99        | cake           |
| 100       | sandwich          | 101       | pen          | 102       | bouquet      | 103       | hoe            |
| 104       | jeep              | 105       | lion         | 106       | donut        | 107       | apple          |
| 108       | whip              | 109       | toilet       | 110       | elephant     | 111       | wrench         |
| 112       | tennis racket     | 113       | liquor       | 114       | hand glass   | 115       | tricycle       |
| 116       | remote            | 117       | bullet       | 118       | pipe         | 119       | baggage        |
| 120       | toothbrush        | 121       | skis         | 122       | chair        | 123       | couch          |
| 124       | sculpture         | 125       | fork         | 126       | air cushion  | 127       | light bulb     |
| 128       | sheep             | 129       | pottery      | 130       | carrot       | 131       | barrel         |
| 132       | fire extinguisher |           |              |           |              |           |                |

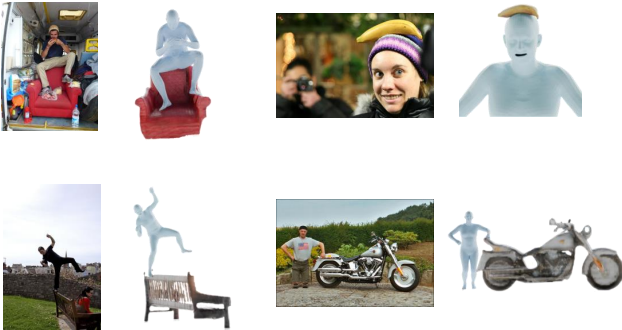

Figure 4. Abnormal HOIs in Open3DHOI.

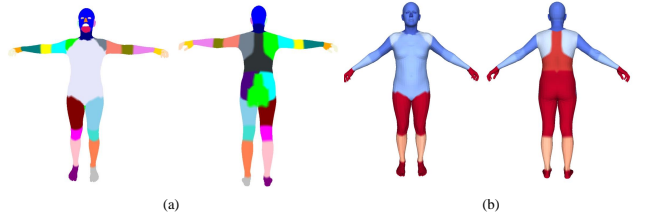

Figure 5. Body parts and annotation heat map.

## 2. Method Details

### 2.1. Coarse Reconstruction

In paper Fig.2, we introduce the process of coarse reconstruction. In this section, we provide additional details

Table 2. Body part name and annotation number.

| Body Part       | Number | Body Part       | Number |
|-----------------|--------|-----------------|--------|
| bottom          | 974    | head            | 31     |
| left elbow      | 55     | left foot       | 335    |
| left palm       | 689    | left hip        | 435    |
| left knee       | 383    | left lower arm  | 87     |
| left lower leg  | 27     | left shoulder   | 112    |
| left upper arm  | 28     | left upper leg  | 801    |
| neck            | 15     | right elbow     | 58     |
| right foot      | 332    | right palm      | 849    |
| right hip       | 417    | right knee      | 361    |
| right lower arm | 81     | right lower leg | 195    |
| right shoulder  | 118    | right upper arm | 37     |
| right upper leg | 781    | torso           | 76     |
| left eye        | 1      | right eye       | 1      |
| left fingers    | 866    | right fingers   | 1065   |
| left ear        | 1      | right ear       | 0      |
| jaw             | 22     | nose            | 0      |
| mouse           | 32     | back            | 270    |

about this process. After reconstructing human and object meshes, we use depth to initialize coarse spatial alignment. We use Zoedepth to estimate depth information for each image and convert the depth to a point cloud  $S$ . We use an object mask to segment points of objects and place the object mesh to the point cloud center as  $Obj_{init}$ . Next, we use Algorithm 1 to align the object mesh with the human mesh.

## 2.2. Annotation Tools

### 2.2.1. Filtering Tool

Fig. 7 (a) shows our filtering tool. First, we judge whether human reconstruction is qualified using the rendered image. There are two buttons, “Delete” and “Pass”, if human reconstruction is bad, we click on the “Delete” button to delete this image otherwise we click on the “Pass” button and go to the next procedure to judge object reconstruction quality. According to the six-view rendering, we choose to keep the image and not. If the reconstruction is bad because the mask completion doesn’t work well, we will ask the volunteer to correct the mask in the last column using a mouse brush. If the mask completion is not bad but the reconstruction is still terrible, or if the occlusion is too serious to reconstruct, we choose to click on the “Delete” button to delete this image. If the volunteer clicks on the “Pass” button for both human and object, then he needs to click on the “Open App” button on the bottom to open the contact annotation app in Fig. 8. Each body part in the app is clickable for volunteers to choose the contact part. After selection, the volunteer needs to go back to the main page and save the final annotation result. Fig. 6 shows cases with bad masks

### Algorithm 1 Align object mesh with human mesh.

**Input:** Points cloud of scene  $S$ , 3D human points  $H_{3D}$ , camera intrinsic parameter  $K_h$ , 3D object model  $Obj_{init}$

**Output:** 3D points of objects  $Obj_{3D}$

1.  $H_{proj} \leftarrow$  project  $H_{3D}$  by  $K_h = \begin{pmatrix} f & 0 & c_x \\ 0 & f & c_y \\ 0 & 0 & 1 \end{pmatrix}$   
 $x_h^{proj} \leftarrow \frac{\bar{z}c_x}{f}, y_h^{proj} \leftarrow \frac{\bar{z}c_y}{f}$
  2.  $Index_h \leftarrow$  compare image and  $H_{proj}$  to obtain the indices of  $S$  corresponding to  $H_{3D}$   
 $H_{3D} \leftarrow H_{3D}[\text{argsort}(H_{3D}[:, 2])/2]$  get half of human points by depth  
 $S_h \leftarrow$  extract points belong to human in  $S$  by  $Index_h$
  3.  $Scale, Translation \leftarrow$  compare  $S_h$  and  $H_{3D}$  to get 3D transformation  
 $scale \leftarrow$  using  $\frac{1}{N^2} \sum_{i=1}^N \sum_{j=1}^N \|p_i - p_j\|_2$  to get scale of  $S_h$  and  $H_{3D}$ , and scale is  $s_{H_{3D}}/s_{S_h}$   
 $translation \leftarrow \text{mean}(S_h) - \text{mean}(H_{3D} * scale)$
  4.  $Obj_{3D} \leftarrow$  operate  $Obj_{init}$  by  $Scale * Obj_{init} + Translation$
- return**  $Obj_{3D}$

and with good masks but bad reconstructions.

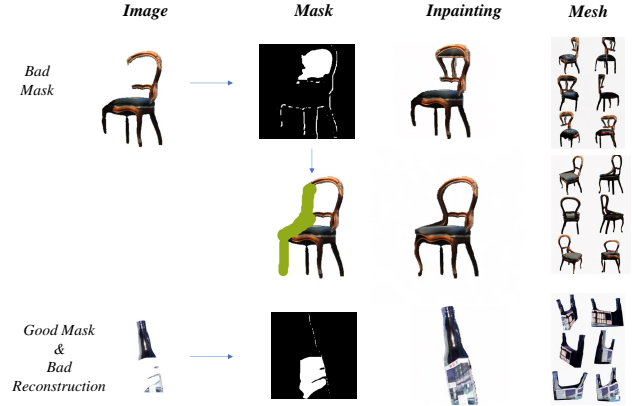

Figure 6. Special cases in filtering process.

### 2.2.2. 3D Interaction Tool

**Blender Annotation Tool.** When we have filtered human and object meshes, then we use the coarse reconstruction method in Sec. 2.1 to initialize 3D HOI. We designed a blender add-on for 3D HOI annotation. There are three buttons on the top, “Load Meshes”, “Export Object Pose and Location” and “Save Delete and Load Next”. The first is to load human and object meshes and image references. Volunteers need to adjust the objects’ positions, rotations, and

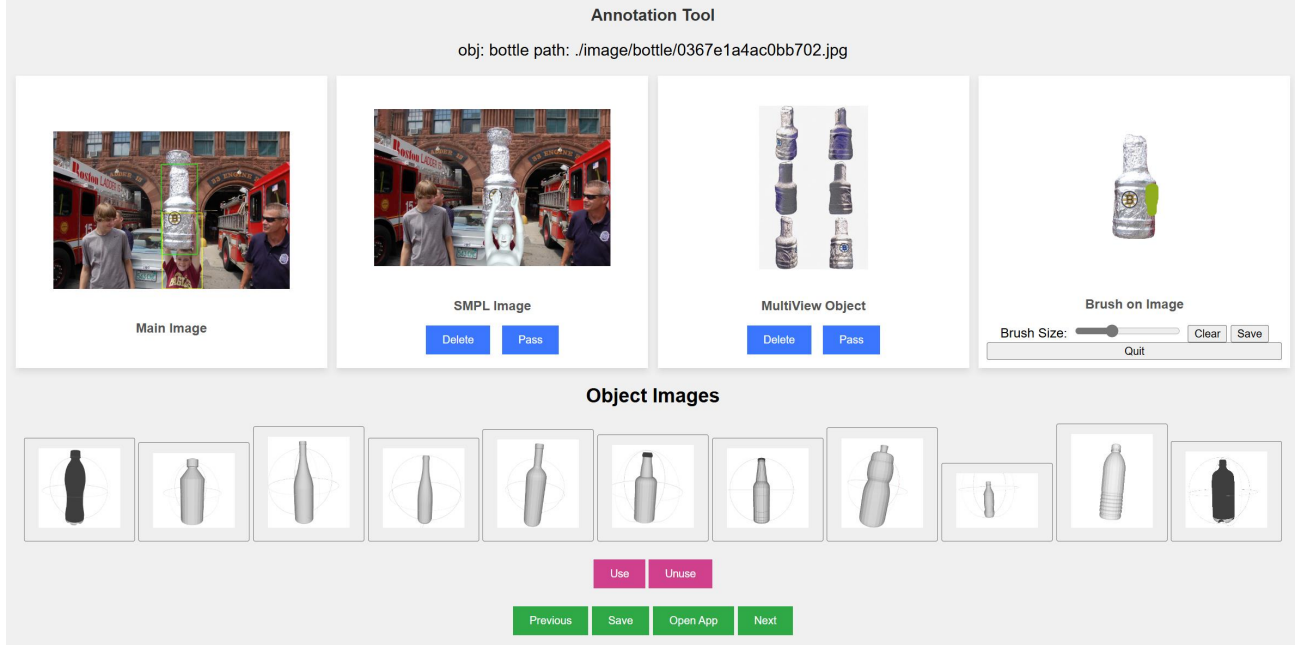

Figure 7. Filtering tool.

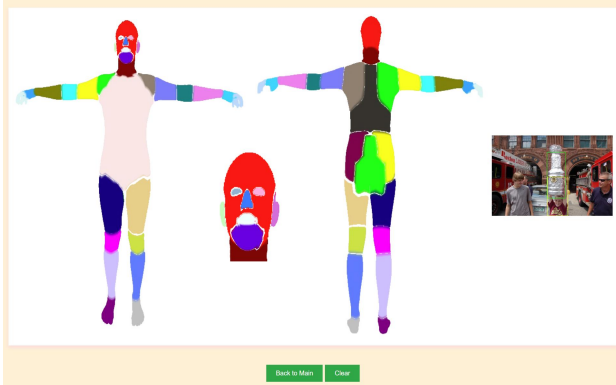

Figure 8. Contact part annotation tool.

scales using a mouse, while the human is fixed. After annotating, volunteers can use the second button to save the result and load the next image, or choose to use the third button to delete this image if it is hard to annotate.

**Fine Annotation Tool.** During the annotation process in Blender, the images were used as references without precise alignment. Although we ensured reasonable 3D interaction during the Blender annotation process, some objects’ poses still exhibit discrepancies compared to the images. Fig. 10 shows our 3D fine annotation tool based on ImageNet3D [1], to optimize the results from previous annotation. We select 581 images with IoU between human-object projection and mask lower than 0.5 and project a line set of

meshes on the image. To ensure 3D interaction accuracy, we also project the meshes from three novel views. Volunteers need to click on the buttons to move, rescale, and rotate the object until it is aligned with the image.

### 2.2.3. Dataset quality

**1) Human-object penetration rate:** we tested the penetration metric following[?] by adding human-in-object penetration and object-in-human penetration together, which is 3.26 while PHOSA is 4.26. Notice that only considering penetration is not fair because in some cases where objects and humans are far away from each other also have zero penetration. Since we annotated human contact parts, so we also tested the distance between the annotated contact part and the object divided by object size, the score of GT after normalization is 0.058, and PHOSA is 0.326. **2) Human and object projection error:** the human projection IoU is 0.621, the object projection error is 0.384, and the H+O projection error is 0.634. Notice that there is a significant occlusion of objects and humans in wild images, especially for objects, so this score can only serve as a reference. **3) Reconstruction quality:** since there is no GT object in our dataset, it is difficult to evaluate the quality of object reconstruction using traditional metrics. We use the inpainted GT object images and the projections of the annotated object mesh to compute SSIM and LPIPS for evaluation. Due to discrepancies between the object pose and the GT image, as well as the inherent differences between real images and mesh projections, including lighting, noise, etc.,

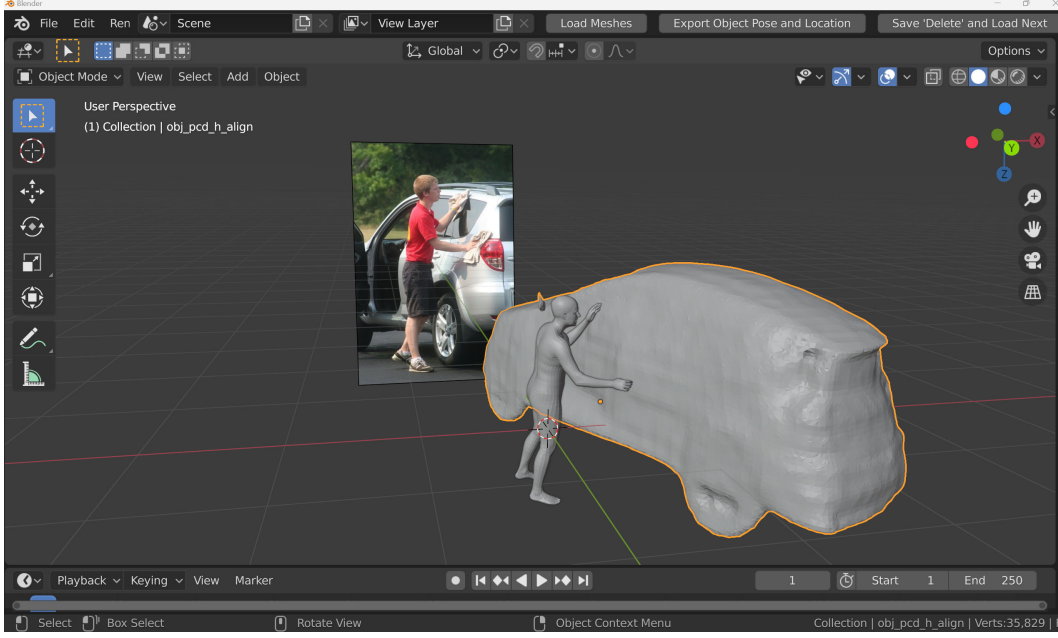

Figure 9

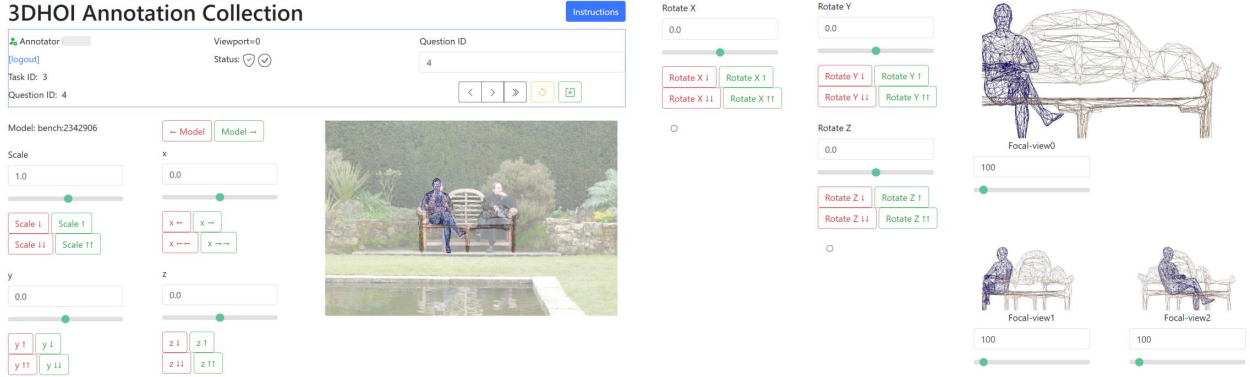

Figure 10. 3D fine annotation tool.

this evaluation is not entirely fair. However, our reconstruction scores still reached an LPIPS of 0.714 and an SSIM of 0.294, demonstrating that the quality of our reconstruction is high.

#### 2.2.4. Discussion

Throughout the whole annotation process, we collected 2.5k+ images from 15k source images, resulting in a pass rate of 17%, which indicates that most 2D HOI images are hard to reconstruct 3D representations. In the future, the filtering process can be accelerated by training a model to judge the reconstruction result, and volunteers only need to filter based on the predictions. Our annotation process has provided enough data to train a judge model.

At the bottom of our filtering app, there are many object

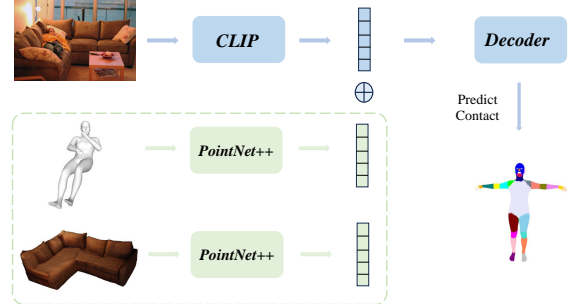

Figure 11. Our contact evaluation model.

template buttons, which are designed to assign corresponding templates for images that closely match the template



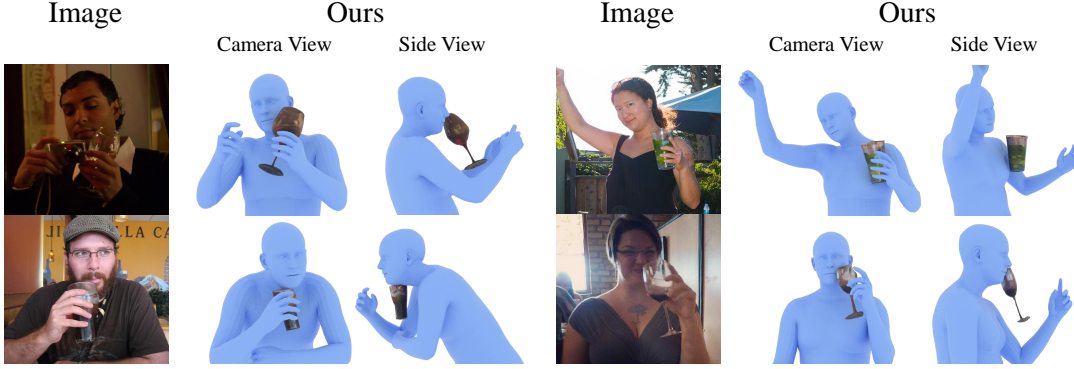

Figure 12. Failure cases of HOI-Gaussian.

Table 3. Results of our contact evaluation task.

| Methods | Micro F1-Score $\uparrow$ | Hamming Loss $\downarrow$ | Jaccard Index $\uparrow$ |
|---------|---------------------------|---------------------------|--------------------------|
| 2D      | 0.6118                    | 0.0874                    | 0.4303                   |
| 2D&3D   | <b>0.6207</b>             | <b>0.0844</b>             | <b>0.4561</b>            |

but have poor reconstruction quality. We build a template library for **58** object categories and totally **212** templates. Although we didn’t use this library to build our Open3DHOI dataset, it is still very useful for future work.

After our 3D fine annotation process, the IoU between human-object projection and mask increased from 0.48 to 0.57, and the IoU between object mesh projection and object mask increased from 0.32 to 0.48, which indicates that our fine annotation tool indeed improved the pose alignment.

### 2.3. LLM Task Setting

#### 2.3.1. PointLLM

We used PointLLM-7B as a test model, and input our annotated human and object mesh vertices. Object vertices have colors and human vertices are colored black. When asking, we will tell PointLLM that “The point cloud is a person interacting with an object. The person is black.” first and then asks specific questions. To decrease the difficulty, we ask PointLM to generate a description first and use Qwen2.5 [2] to extract the exact word from our action and object list.

#### 2.3.2. ChatPose

In Sec.6.2, we state that we select images with multiple images. Although our dataset only contains single-person annotation, there are still many images with more than one person, we used Detectron2 [3] to detect these images for our testing. Our task is to ask ChatPose to locate the specific person interacting with the specific object according to its understanding of the interaction in the image. The pose it answered has no root pose and location, so we compare the prediction with GT using the same root pose, zero pose at zero location. The metrics we used are MPJPE (Mean

Per Joint Position Error) and MPVPE (Mean Per Vertex Position Error), which are common metrics in human pose estimation.

## 3. Additional Experiments

### 3.1. Contact Evaluation

Since our dataset contains contact annotations, we want to evaluate whether 3D information would be conducive to estimating contact regions compared to image only. Therefore, we design a simple pipeline to estimate the contact regions. As Fig. 11 shows, we use clip-ViT-B/32 to encode image and pointnet++ to encode normalized human point clouds and object point clouds respectively. Image features and point clouds features of human and object are fused and put into an MLP decoder. We treat this problem as a multi-label classification task and use Micro F1 Score, Hamming Loss and Jaccard Index to evaluate the accuracy. The Micro F1 Score calculates precision and recall globally across all labels. Hamming Loss measures the fraction of incorrect label predictions over the total number of labels. Jaccard Index evaluates the similarity between the predicted and true label sets for each sample. Our current implementation simply concatenates 3D and 2D features and is trained on only 2,000 samples. However, our results over multiple metrics in Tab. 3 still indicate that 3D information is beneficial to the estimation of contact regions.

### 3.2. Failure Cases

Fig. 12 shows some failure cases of our HOI-Gaussian optimizer. In these cases, human body parts occlude each other severely, and the object happens to be located between the occluded areas, which becomes challenging to determine which body part the object should contact with.

### 3.3. More Results

Fig. 13 shows more results comparison between GT, PHOSA, and Ours.

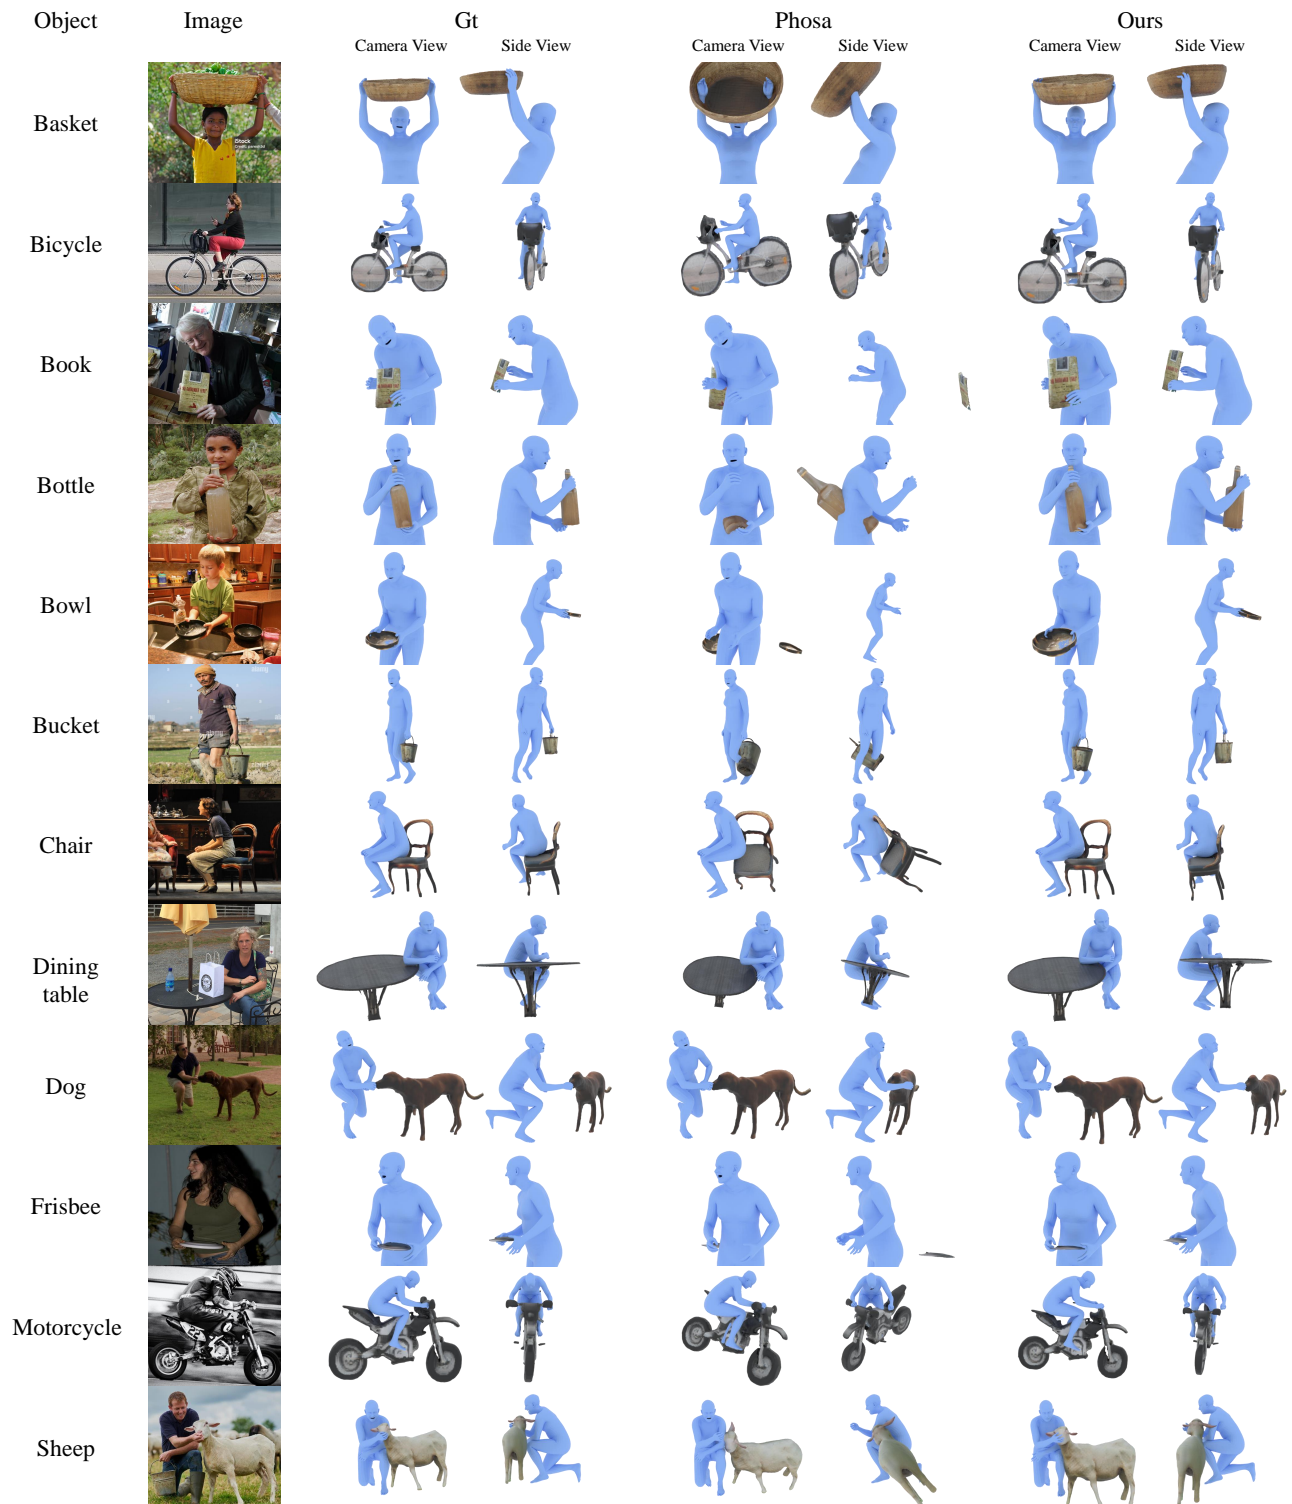

Figure 13. More results.

## References

- [1] Wufei Ma, Guanning Zeng, Guofeng Zhang, Qihao Liu, Letian Zhang, Adam Kortylewski, Yaoyao Liu, and Alan

Yuille. Imagenet3d: Towards general-purpose object-level 3d understanding. *arXiv preprint arXiv:2406.09613*, 2024. 4

- [2] Qwen Team. Qwen2.5: A party of foundation models, 2024. 6
- [3] Yuxin Wu, Alexander Kirillov, Francisco Massa, Wan-Yen Lo, and Ross Girshick. Detectron2. <https://github.com/facebookresearch/detectron2>, 2019. 6
